# Supplementary material for: Partial bisulfite conversion for unique template sequencing
Source: Oxford University Press journal article supplement (doi:10.1093/nar/gkx1054), 2017-10-18
Supplement: gkx1054_supp.zip [file gkx1054_supp.zip]

Archive with 2 entries (2 files):
- nar-02196-k-2017-File009.pdf
- nar-02196-k-2017-File010.pdf
